# Supplementary material
Source: PubMed Central journal article supplement (PMC6075550)
Supplement: awx036_supp.pdf [file awx036_supp.pdf]

# Salience and Default Mode Network Dysregulation in Chronic Cocaine Users Predict Treatment Outcome

## Supplementary Information

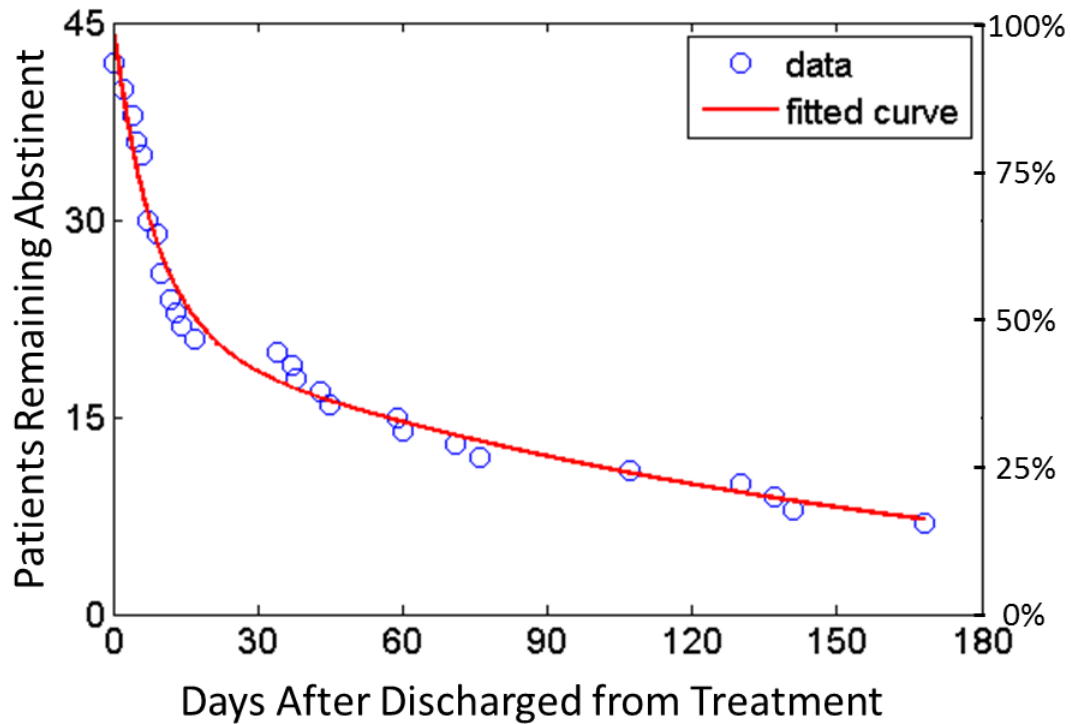

**Supplementary Fig. 1** Frequency of patient remaining abstinent after discharged from treatment. The number of patients remaining abstinent (vertical axis,  $y$ ) decreases along days after discharge from treatment (horizontal axis,  $x$ ) as an exponential function:  $f(y) = a \cdot \exp(b \cdot x) + c \cdot \exp(d \cdot x)$ , in which the coefficients (with 95% confidence bounds) are given by  $a = 23.05$  (19.29, 26.8),  $b = -0.1171$  (-0.1525, -0.08183),  $c = 21.6$  (18.36, 24.85), and  $d = -0.006519$  (-0.008545, -0.004492).

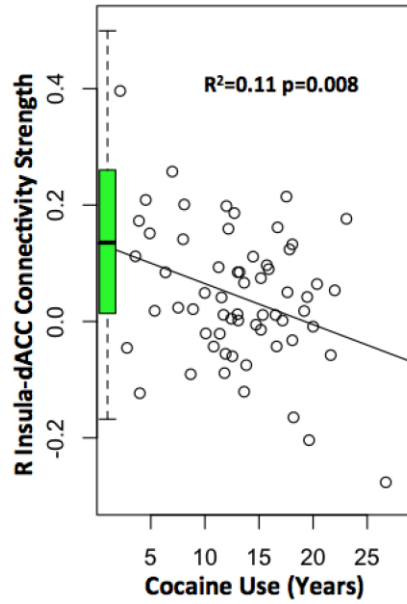

**Supplementary Fig. 2** Correlation between the rsFC strength and cocaine use measures. Negative correlation between the rsFC strength of the right insula-dACC circuit and years of cocaine use. Boxplots summarize the connectivity strength of the same circuits in the healthy control group.

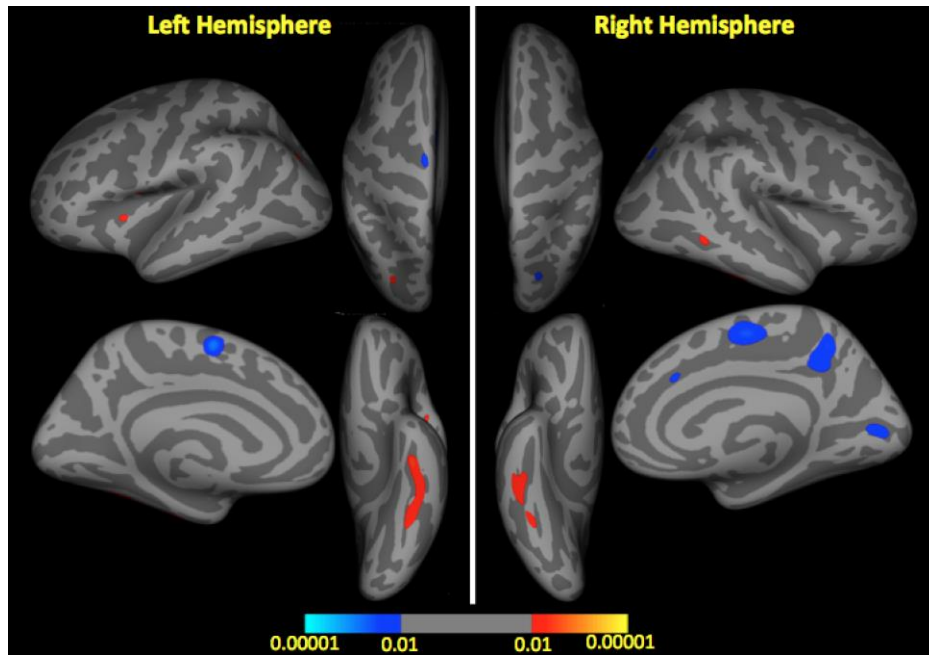

**Supplementary Fig. 3** Correlation between the cortical thickness and years of cocaine use. Note: color bar shows vertex-based p values, where blue color is for negative correlations and red is for positive correlations. No clusters survived after multiple comparison corrections.

**Supplementary Table 1** Brain regions showing significant cortical thickness difference between non-treatment seeking cocaine users and matched healthy controls

| Regions                    | Peak (Talairach) |    |     | Peak T-value | Cluster size (mm <sup>2</sup> ) |
|----------------------------|------------------|----|-----|--------------|---------------------------------|
|                            | x                | y  | z   |              |                                 |
| <b>Right insula</b>        | 38               | -5 | 17  | -3.61        | 1073                            |
| <b>Left insula</b>         | -43              | -4 | 15  | -3.69        | 1259                            |
| <b>Right temporal pole</b> | 35               | 2  | -31 | 5.58         | 1274                            |
| <b>Left temporal pole</b>  | -42              | -2 | -30 | 4.55         | 1290                            |

**Supplementary Table 2** Brain regions showing significant weaker resting-state functional connectivity in non-treatment-seeking cocaine users

| Seed regions               | Regions of difference                                                           | Peak (Talairach) |     |     | Peak T | Cluster size (voxels) |
|----------------------------|---------------------------------------------------------------------------------|------------------|-----|-----|--------|-----------------------|
|                            |                                                                                 | x                | y   | z   |        |                       |
| <b>Right insula</b>        | RI_1: dACC (BA24/32/6/8)                                                        | 4                | 30  | 37  | -4.44  | 163                   |
| <b>Left insula</b>         | LI_1: dACC (BA32/24/6/8)                                                        | 10               | 32  | 20  | -4.37  | 175                   |
| <b>Right temporal pole</b> | RTP_1: Left middle temporal gyrus (anterior & middle parts) (BA21/22/38)        | -49              | -5  | -15 | -3.90  | 228                   |
|                            | RTP_2: Right middle temporal gyrus (temporal pole and anterior parts) (BA21/38) | 52               | -2  | -13 | -4.41  | 207                   |
|                            | RTP_3: Right supramarginal gyrus (BA40/39)                                      | 52               | -50 | 27  | -4.33  | 176                   |
|                            | *RTP_4: Medial prefrontal cortex (BA10/32/9)                                    | -10              | 49  | 16  | -4.32  | 127                   |
|                            | RTP_5: Left superior/middle temporal gyrus, supramarginal gyrus (BA22/39/40)    | -46              | -53 | 19  | -3.68  | 100                   |
|                            | RTP_6': Right medial superior frontal cortex (BA8)                              | 16               | 42  | 50  | -3.77  | 79                    |
| <b>Left temporal pole</b>  | LTP_1: Cerebellum                                                               | -4               | -56 | -35 | -4.34  | 134                   |
|                            | LTP_2': Right superior/middle temporal gyrus (BA38/21)                          | 52               | 6   | -18 | -4.14  | 97                    |

R/L: right and left; I: insula; TP: temporal pole.

\*RTP\_4 is the circuted used in Supplementary Table 4 and 5.

RTP\_6' and LTP\_2': a trend level of weaker rsFC with corrected  $ps = 0.08$  and  $0.06$ .

**Supplementary Table 3** The p values of correlations between the imaging measures and cocaine use measures.

| P values    | Tk RI | Tk LI | Tk RTP | Tk LTP | rsFC RI_1 | rsFC LI_1 | rsFC RTP_1 | rsFC RTP_2 | rsFC RTP_3 | rsFC RTP_4 | rsFC RTP_5 | rsFC RTP_6' | rsFC LTP_1 | rsFC LTP_2' |
|-------------|-------|-------|--------|--------|-----------|-----------|------------|------------|------------|------------|------------|-------------|------------|-------------|
| Use Year    | 0.47  | 0.17  | 0.64   | 0.91   | 0.008     | 0.345     | 0.38       | 0.75       | 0.71       | 0.10       | 0.99       | 0.99        | 0.13       | 0.23        |
| Current use | 0.63  | 0.53  | 0.30   | 0.20   | 0.81      | 0.91      | 0.32       | 0.59       | 0.63       | 0.07       | 0.14       | 0.00016     | 0.92       | 0.26        |

Tk: thickness.

RI: right insula; LI: thickness of left insula; RTP: right temporal pole; LTP: left temporal pole.

rsFC LI\_1: rsFC strength of the circuit LI\_1 (see Supplementary Table 2).

**Supplementary Table 4** Statistic summary of cocaine relapse predictive models

| Model | Model $\chi^2$ | Model $p$ | $\Delta\chi^2$ | $\Delta p$ |
|-------|----------------|-----------|----------------|------------|
| 1     | 6.32           | .044      | 7.22           | .007       |
| 2     | 13.43          | .009      | 5.15           | .023       |

Dependent Variable: Time to relapse up to 168 days

Model 1: Predictors: (Constant, Age, FD), years of education

Model 2: Predictors: (Constant, Age, FD), years of education, rsFC (R. TP - mPFC)

rsFC (R. TP - mPFC): resting-state functional connectivity between right temporal pole and medial prefrontal cortex (RTP\_4 in Supplementary Table 2, Figure 1C)

**Supplementary Table 5** Coefficients of cocaine relapse predictive models

| Model |                     | $\beta$ (SE) | Exp( $\beta$ ) | Wald | $P$  |
|-------|---------------------|--------------|----------------|------|------|
| 1     | Years of Education  | -.24(.09)    | .79            | 6.42 | .011 |
| 2     | Years of Education  | -.25(.10)    | .78            | 6.93 | .008 |
|       | rsFC (R. TP - mPFC) | -2.37(1.10)  | .09            | 4.62 | .032 |

Dependent Variable: Time to relapse up to 168 days

Model 1: Predictors: (Constant, Age, FD), years of education

Model 2: Predictors: (Constant, Age, FD), years of education, rsFC (R. TP - mPFC)

$\beta$ (SE): Coefficient (Standard Error)

rsFC (R. TP - mPFC): resting-state functional connectivity between right temporal pole and medial prefrontal cortex (RTP\_4 in Supplementary Table 2, Figure 1C)
